# Supplementary material
Source: MDPI journal article supplement (https://www.mdpi.com/2813-141X/2/4/25)
Supplement: s1 [file s1]

## Supplementary Material

### Search Strategy

#### PubMed Search:

- Search limit: 2001-July 2023
- Keywords and Boolean terms:

(reflection [Title/Abstract] OR reflective [Title/Abstract]) AND (education [Title/Abstract] OR postgraduate [Title/Abstract] OR learning [Title/Abstract] OR practice [Title/Abstract]) AND (medical [Title/Abstract] OR anaesthesia [Title/Abstract] OR anesthesia [Title/Abstract])

Results yielded: 4145

- The English language articles were screened for describing the theory and practice of reflection in Anaesthesia education and practice. Due to insufficient articles on anaesthesia speciality, the author screened for articles relating to the practical aspects of reflection in medical education. Articles were selected to identify purposes (e.g. professional development, learning aspects, clinical), processes (e.g. models, skills necessary to reflect, blending with other learning methods, writing), pitfalls (e.g. assessment, barriers) and promotion (e.g. role of supervisor, organization) of reflection for this review based on the applicability of contents for anaesthesia speciality. Highly cited articles were selected in case of multiple relevant articles.

#### Google Scholar Search:

- Phrase used (Filter: All words in the title of the article): Results yielded

reflection medical education: 181

reflective medical education: 111

reflection anesthesia: 16

reflection anaesthesia: 5

reflective anesthesia: 7

reflective anaesthesia: 3

Duplicate articles were removed. For remaining articles, the strategy was as described above.
